# Supplementary material
Source: Springer Nature journal article supplement (https://www.springermedizin.de/resource/supplementary/12936_2012_2552_MOESM1_ESM.pdf/9542560)
Supplement: MOESM1 [file 9542560]

# STUDY AREA

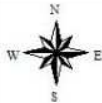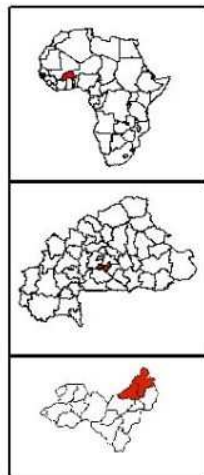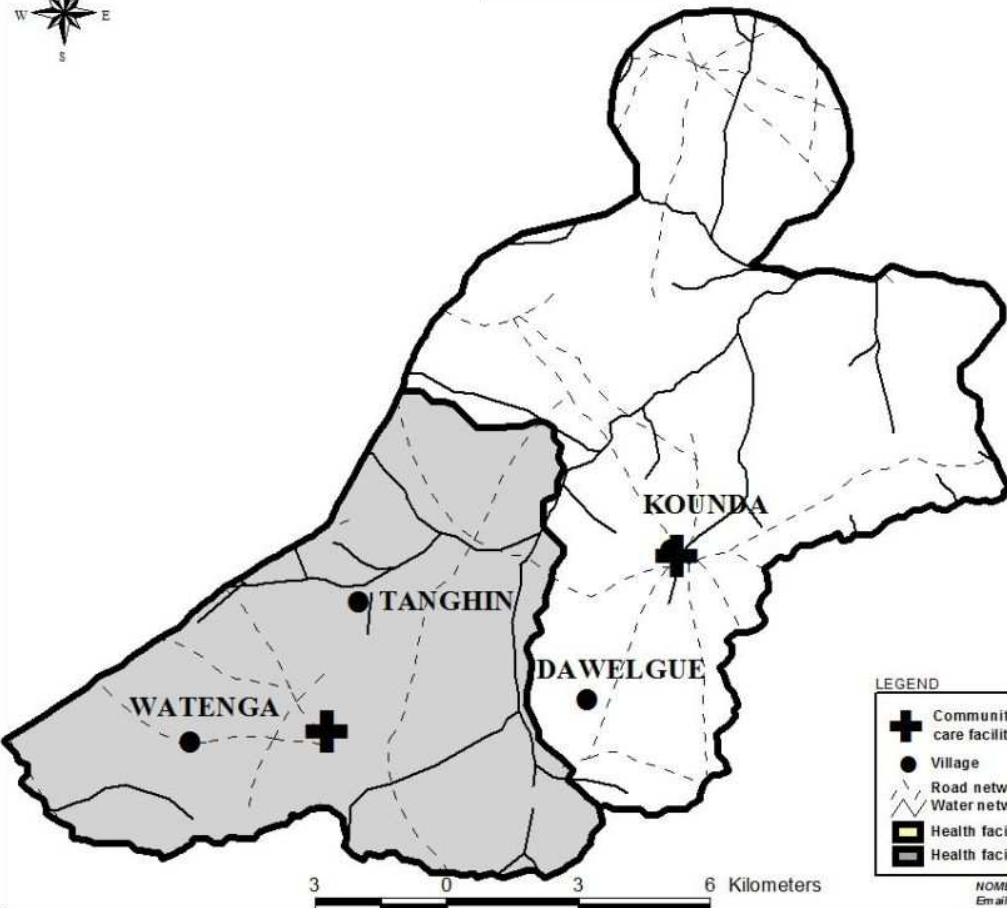

## LEGEND

- Community health care facility
- Village
- Road network
- Water network
- Health facility area of KOUNDA
- Health facility area of SAPONE MARCHÉ
